# Supplementary material
Source: HighWire-hosted journal article supplement (https://www.jneurosci.org/highwire/filestream/600051/field_highwire_adjunct_files/1/Figure_S2.pdf)

Figure S2

L2/3 components of axons in control animals

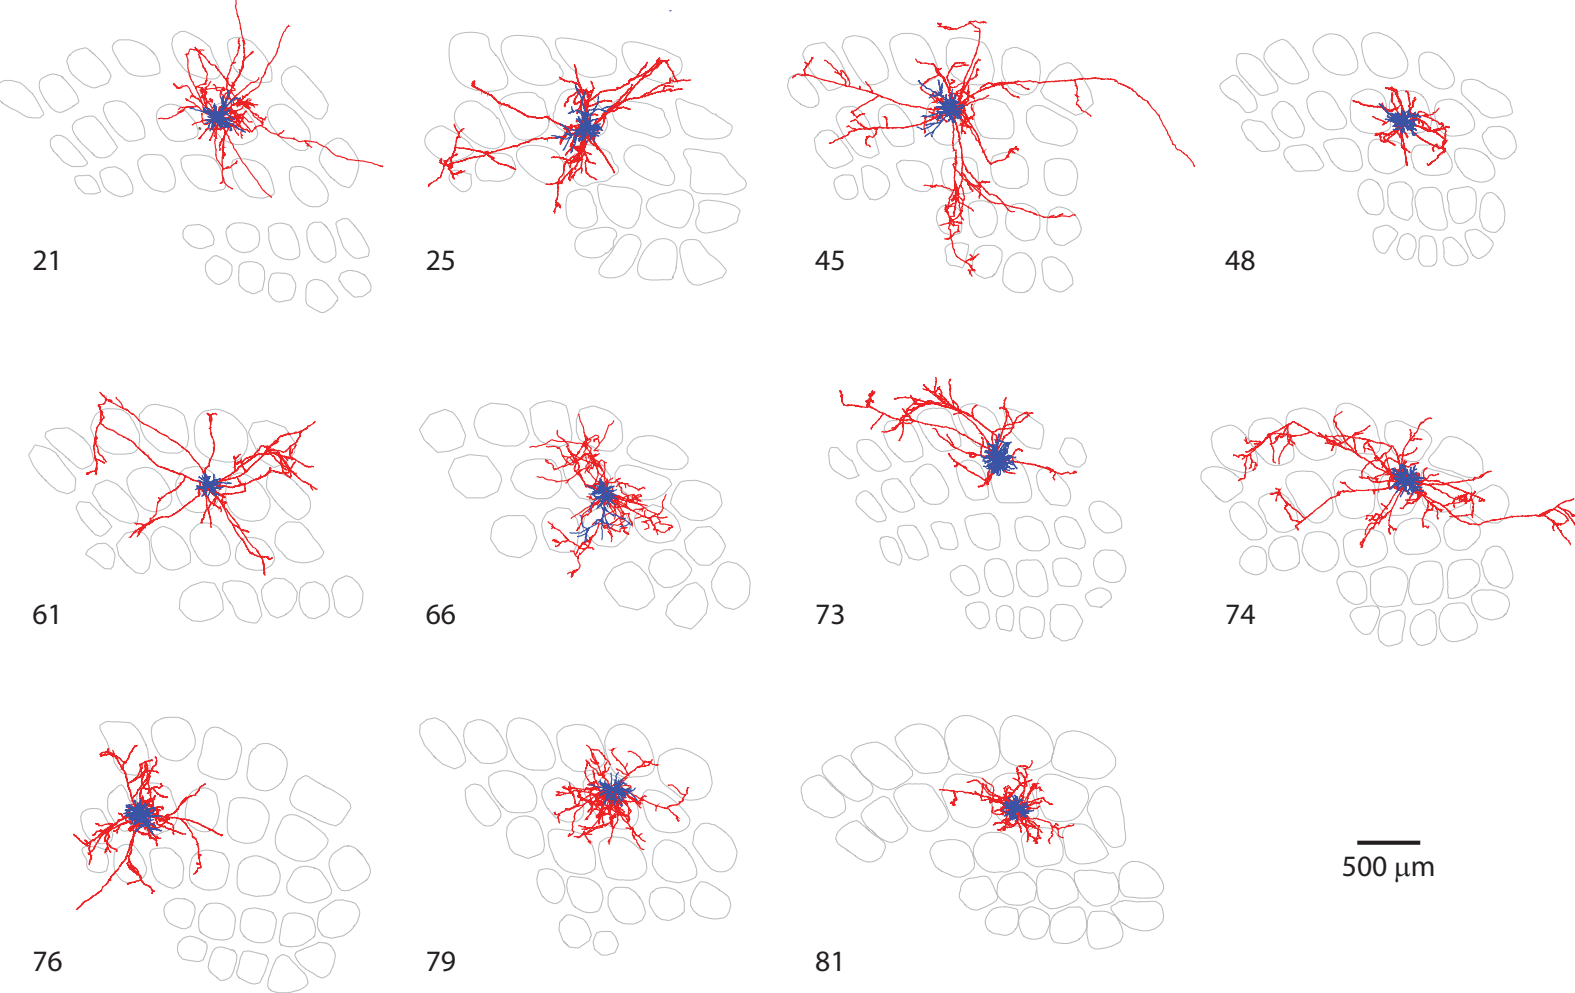

Supplement: Figure_S2.pdf [file Figure_S2.pdf]
